# Supplementary material for: Visceral and subcutaneous adipose stem cells modulate colorectal cancer cell progression: direct and in-direct contact distinctly accelerate tumor aggressiveness.
Source: Research Square preprint supplement (doi:10.21203/rs.3.rs-6559242/v1), 2025-05-09
Supplement: Supplementary file 1 [file 2ca3bb0e6d91ee7b232750ab.docx]

Table S1. Sequence of primers

| **Abbreviation** | **Full name of the gene** | **Forward primer 5’-3’** | **Reverse primer 5’-3’** |
| --- | --- | --- | --- |
| *VIM* | *vimentin* | GCTTCGCCAACTACATCGACAAG | CTTTGTCGTTGGTTAGCTGGTCC |
| *SNAI1* | *snail family transcriptional repressor 1* | CCAATCGGAAGCCTAACTACAG | AGAGTCCCAGATGAGCATTG |
| *CTNNB1* | *catenin beta 1* | CTCAAGCTGATTTGATGGAGTTG | ACATCCTCTTCCTCAGGATTG |
| *CDKN1A* | *cyclin-dependent kinase inhibitor 1a* | ATGTCCGTCAGAACCCATG | AGTGGTGTCTCGGTGAC |
| *TP53* | *tumor protein 53* | CCTCAGCATCTTATCCGAGTGG | TGGATGGTGGTACAGTCAGAGC |
| *NANOG* | *nanog homeobox* | CACCTATGCCTGTGATTTGTGGG | TGGGACTGGTGGAAGAATCAGG |
| *CD44* | *CD44 molecule* | CCAGAAGGAACAGTGGTTTGGC | ACTGTCCTCTGGGCTTGGTGTT |
| *PROM1* | *prominin 1* | TTGCTGCTTGTGGAATAGACAGAATG | GGACTCGTTGCTGGTGAATTGTT |
| *THY1* | *thy-1 cell surface antigen* | GCAGAAGGTGACCAGCCTAAC | AAGTTGGTTCGGGAGCGGTA |
| *KLF4* | *kruppel-like factor 4* | CATCTCAAGGCACACCTGCGAA | TCGGTCGCATTTTTGGCACTGG |

Table of primer sequences used for qRT-PCR analysis.
